# Supplementary material
Source: HighWire-hosted journal article supplement (https://www.cmajopen.ca/highwire/filestream/87227/field_highwire_adjunct_files/4/2021-0145-5-at.pdf)
Supplement: 2021-0145-5-at.pdf [file 2021-0145-5-at.pdf]

**Supplemental Figure 3.** Number of patients awaiting ophthalmic surgery amongst the cohort of patients on the wait list at the start of the pandemic on March 15, 2020. The simulations were run 50 times (variations in projected estimated represented by grey lines) for a total of 240,000 patients.

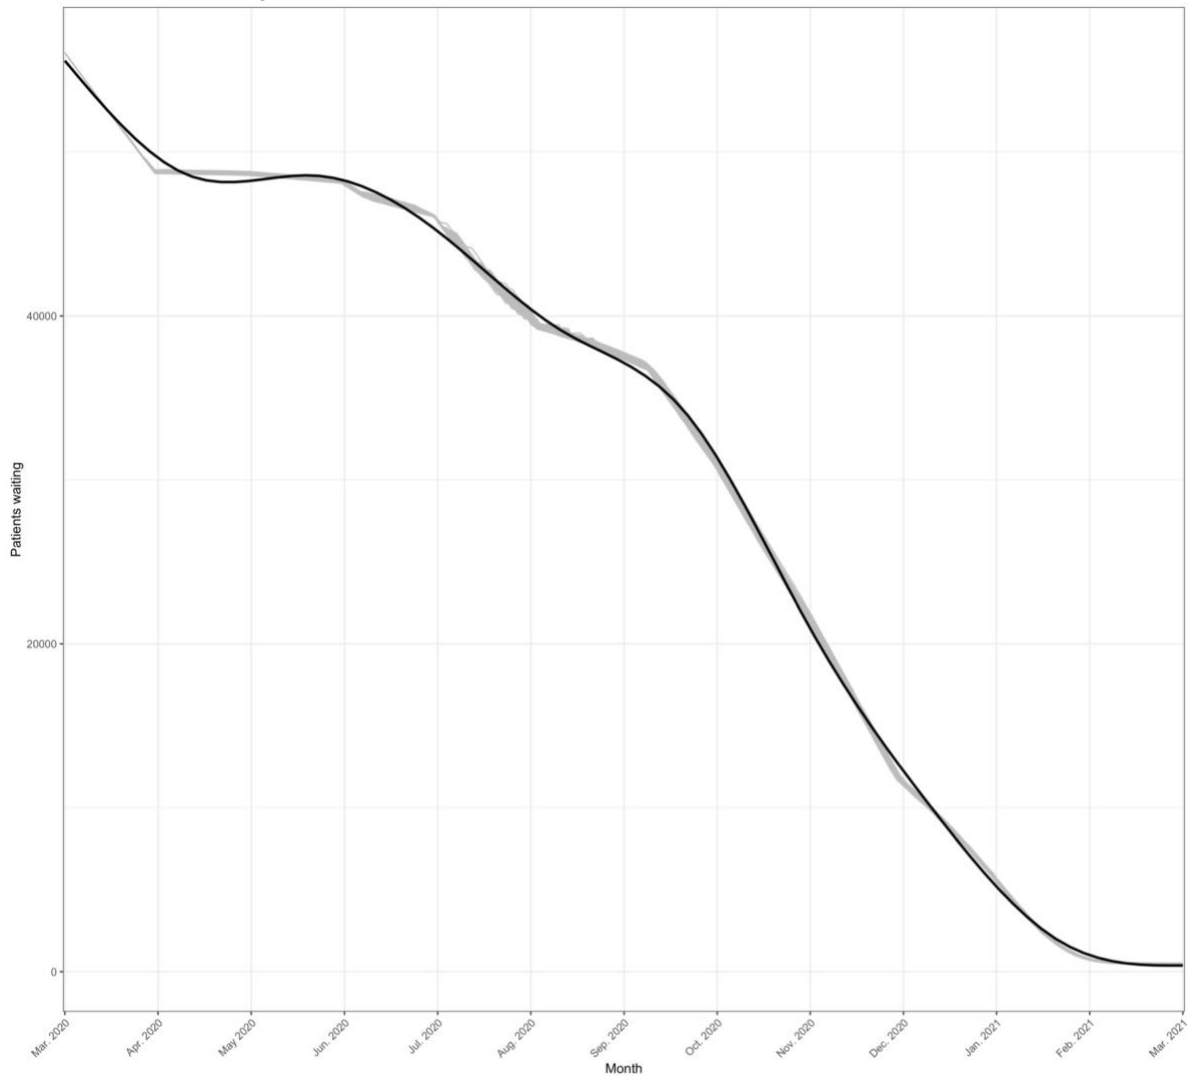

Appendix 5, as supplied by the authors. Appendix to: Felfeli T, Ximenes R, Naimark DMJ, et al. The ophthalmic surgical backlog associated with the COVID-19 pandemic: a population-based and microsimulation modelling study. *CMAJ Open* 2021. doi: 10.9778/cmajo.20210145. Copyright © 2021 The Author(s) or their employer(s). To receive this resource in an accessible format, please contact us at [cmajgroup@cmaj.ca](mailto:cmajgroup@cmaj.ca).
